# Supplementary material for: A biphasic epigenetic switch controls immunoevasion, virulence and niche adaptation in non-typeable Haemophilus influenzae
Source: PubMed Central journal article supplement (PMC4525171; doi:10.1038/ncomms8828), 2015-07-28
Supplement: ncomms8828-s1.pdf [file ncomms8828-s1.pdf]

# Supplementary Figure 1

## C486 *modA4* genome summary

a

| Sample                    | Contigs | # of Bases |
|---------------------------|---------|------------|
| C486<br><i>modA4</i> ON   | 1       | 1,846,507  |
| C486<br><i>modA4::kan</i> | 1       | 1,847,851  |

b

| Methyltransferase Specificity                                   | Modified Base | <i>modA4</i> ON | <i>modA4::kan</i> |
|-----------------------------------------------------------------|---------------|-----------------|-------------------|
| 5' -GATC-3'<br>3' -CTAG-5'                                      | m6A           | 100%            | 99.9%             |
| 5' -CGAG-3'<br>3' -GCTC-5'                                      | m6A           | 99.2%           | 0.1%              |
| 5' -ACAN <sub>6</sub> RTTG-3'<br>3' -TGTN <sub>6</sub> YAAAC-5' | m6A           | 100%<br>98.9%   | 100%<br>98.5%     |
| 5' -CTKMAAG-3'<br>3' -GAMKTC-5'                                 | m6A           | 69.8%<br>*      | 67.1%<br>*        |
| 5' -VCTGGAG-3'<br>3' -BGACCTC-5'                                | m6A           | 52%<br>50%      | 57%<br>53%        |

c

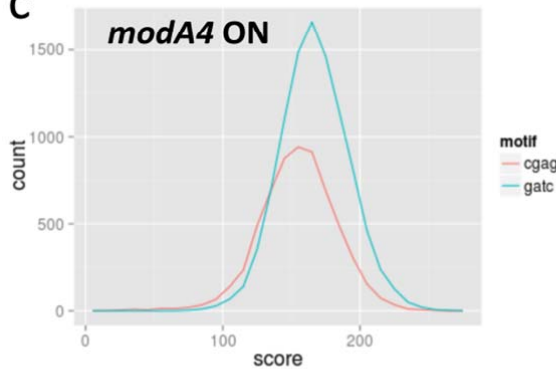

d

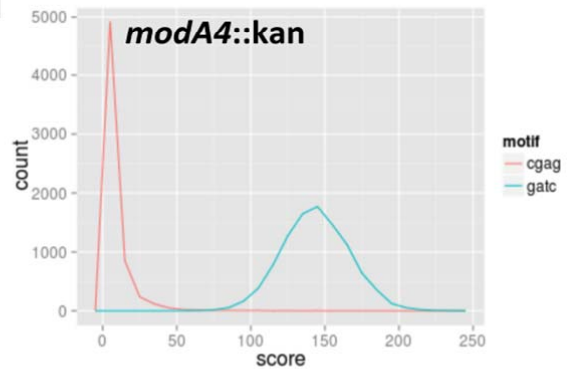

e

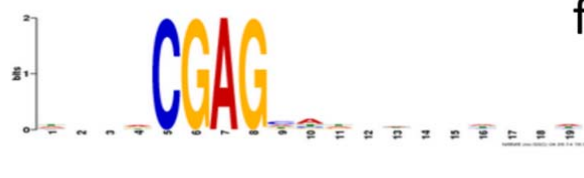

f

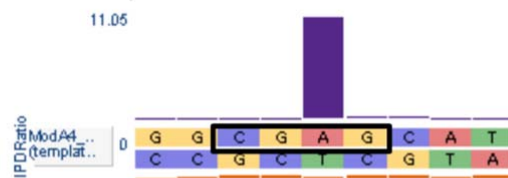

g

| Motif | Total in Genome | # in Coding Region | % in Coding Region | # in non-Coding Region | % in non-Coding Region | Positive Strand | Negative Strand | Observed # Motifs | Expected # Motifs | Percent (obs/exp) |
|-------|-----------------|--------------------|--------------------|------------------------|------------------------|-----------------|-----------------|-------------------|-------------------|-------------------|
| CGAG  | 6203            | 2670               | 43.0               | 3533                   | 57.0                   | 3129            | 3074            | 6203              | 7852              | 79.0              |

# 477 *modA5* genome summary

a

| Sample                | Contigs | # of Bases |
|-----------------------|---------|------------|
| 477 <i>modA5</i> ON   | 1       | 1,846,259  |
| 477 <i>modA5::kan</i> | 1       | 1,847,538  |

b

| Methyltransferase Specificity                                    | Modified Base | <i>modA5</i> ON | <i>modA5::kan</i> |
|------------------------------------------------------------------|---------------|-----------------|-------------------|
| 5' -GATC-3'<br>3' -CTAG-5'                                       | m6A           | 99.0%           | 96.8%             |
| 5' -ACAGC-3'<br>3' -TGTCG-5'                                     | m6A           | 99.8%           | 0%                |
| 5' -AAAYN <sub>6</sub> RTAY-3'<br>3' -TTTRN <sub>6</sub> YATR-5' | m6A           | 97.1%<br>99.1%  | 91.6%<br>95.6%    |
| 5' -CYTAN <sub>5</sub> RTC-3'<br>3' -GRATN <sub>5</sub> YAG-5'   | m6A           | 97.8%<br>95.8%  | 95.1%<br>92.7%    |

c

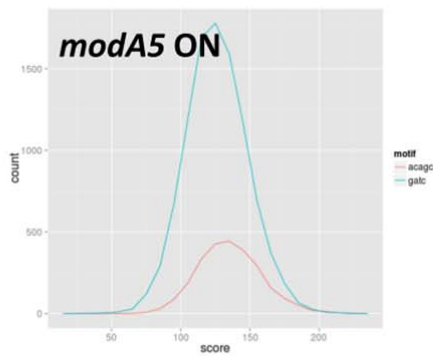

d

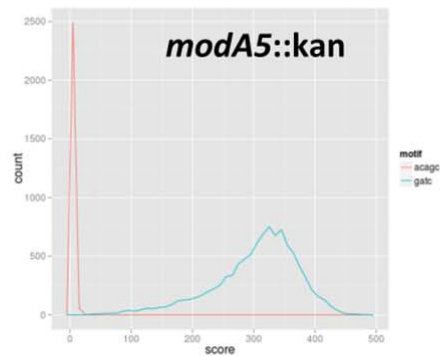

e

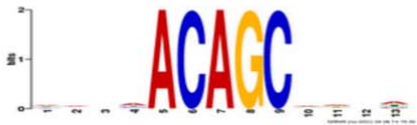

f

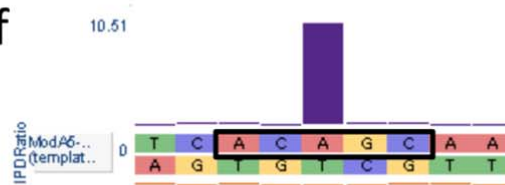

g

| Motif | Total in Genome | # in Coding Region | % in Coding Region | # in non-Coding Region | % in non-Coding Region | Positive Strand | Negative Strand | Observed # Motifs | Expected # Motifs | Percent (obs/exp) |
|-------|-----------------|--------------------|--------------------|------------------------|------------------------|-----------------|-----------------|-------------------|-------------------|-------------------|
| ACAGC | 2548            | 1428               | 56.0               | 1120                   | 44.0                   | 1302            | 1246            | 2548              | 2434              | 104.7             |

# 1209 *modA9* genome summary

a

| Sample                 | Contigs | # of Bases                      |
|------------------------|---------|---------------------------------|
| 1209 <i>modA9</i> ON   | 3       | 1,255,033<br>544,507<br>126,439 |
| 1209 <i>modA9::kan</i> | 1       | 1,912,859                       |

b

| Methyltransferase Specificity                | Modified Base | <i>modA9</i> ON | <i>modA9::kan</i> |
|----------------------------------------------|---------------|-----------------|-------------------|
| 5' -GATC-3'<br>3' -CTAG-5'                   | m6A           | 98.7%           | 99.2%             |
| 5' -GANNNNNNNTAYG-3'<br>3' -CTNNNNNNNATRC-5' | m6A           | 97.9%<br>99.4%  | 99.2%<br>99.4%    |
| 5' -GANNNNNRTC-3'<br>3' -CTCNNNNYAG-5'       | m6A           | 93.0%<br>91.7%  | 93.0%<br>92.0%    |
| 5' -CGWAAT-3'<br>3' -GCWTTA-5'               | m6A           | 96.3%           | 97.0%             |
| 5' -CCTGA-3'<br>3' -GGACT-5'                 | m6A           | 95.6%           | 5.7%              |
| 5' -GCCTGC-3'<br>3' -CGGACG-5'               | 5mC?          | 6.7%            | 6.8%              |

c

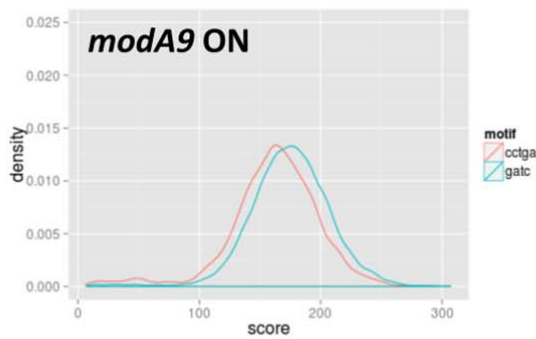

d

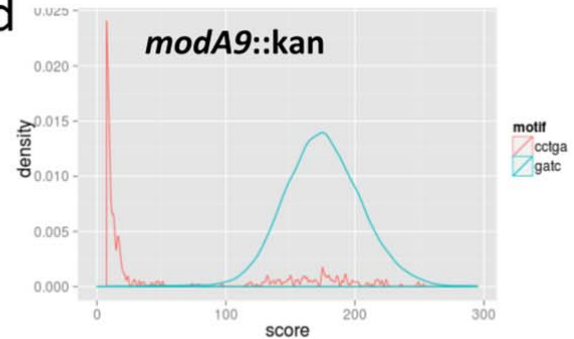

e

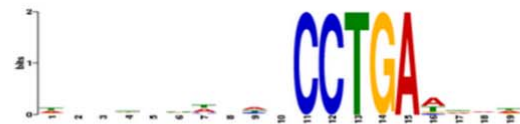

f

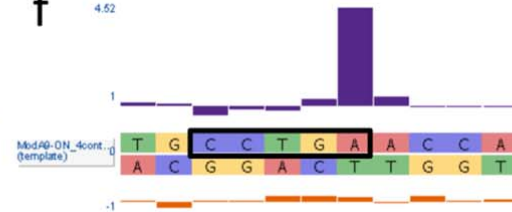

g

| Motif | Total in Genome | # in Coding Region | % in Coding Region | # in non-Coding Region | % in non-Coding Region | Positive Strand | Negative Strand | Observed # Motifs | Expected # Motifs | Percent (obs/exp) |
|-------|-----------------|--------------------|--------------------|------------------------|------------------------|-----------------|-----------------|-------------------|-------------------|-------------------|
| CCTGA | 2503            | 1368               | 54.7               | 1135                   | 45.3                   | 1296            | 1207            | 2503              | 2663              | 94.0              |

# R2866 *modA10* genome summary

a

| Sample                      | Contigs | # of Bases |
|-----------------------------|---------|------------|
| R2866<br><i>modA10</i> ON   | 1       | 1,932,283  |
| R2866<br><i>modA10::kan</i> | 1       | 1,933,738  |

b

| Methyltransferase Specificity                | Modified Base | <i>modA10</i> ON | <i>modA10::Kan</i> |
|----------------------------------------------|---------------|------------------|--------------------|
| 5' -GATC-3'<br>3' -CTAG-5'                   | m6A           | 99.4%            | 99.4%              |
| 5' -CCTAC-3'<br>3' -GGATG-5'                 | m6A           | 97.4%            | 0.4%               |
| 5' -CAANNNNNTAAA-3'<br>3' -GTTRNNNNNA TTT-5' | m6A           | 98.5%<br>99.5%   | 97.7%<br>99.8%     |
| 5' -ACGNNNNRAAT-3'<br>3' -TGCNNNNYTTA-5'     | m6A           | 99.9%<br>99.9%   | 98.9%<br>99.2%     |

c

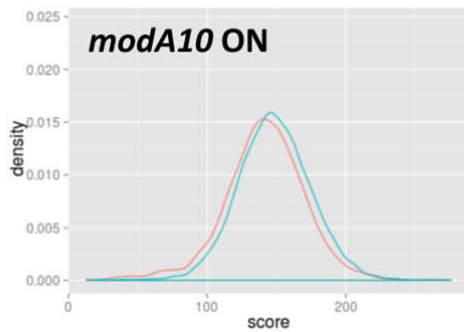

d

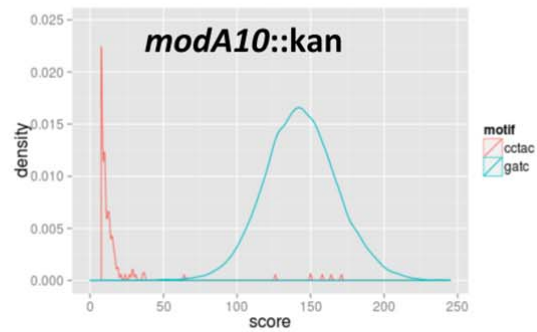

e

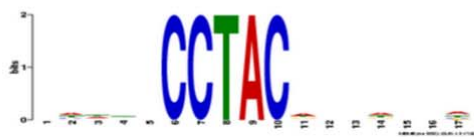

f

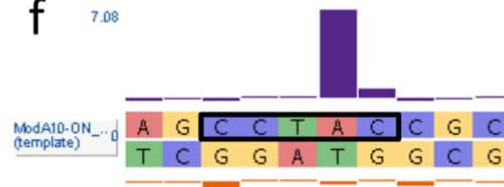

g

| Motif | Total in Genome | # in Coding Region | % in Coding Region | # in non-Coding Region | % in non-Coding Region | Positive Strand | Negative Strand | Observed # Motifs | Expected # Motifs | Percent (obs/exp) |
|-------|-----------------|--------------------|--------------------|------------------------|------------------------|-----------------|-----------------|-------------------|-------------------|-------------------|
| CCTAC | 1244            | 384                | 30.9               | 860                    | 69.1                   | 617             | 627             | 1244              | 2714              | 45.8              |

## 723 *modA2* genomic DNA & pET51::*modA2* plasmid DNA

**a**

| Sample                    | Contigs | # of Bases |
|---------------------------|---------|------------|
| 723<br><i>modA2</i> ON    | 1       | 1,887,620  |
| 723<br><i>modA2</i> ::kan | 1       | 1,889,018  |

**b**

| Methyltransferase Specificity                                  | Modified Base | <i>modA2</i> ON | <i>modA2</i> Kan | <i>modA2</i> OFF |
|----------------------------------------------------------------|---------------|-----------------|------------------|------------------|
| 5' -GATC-3'<br>3' -CTAG-5'                                     | m6A           | 99.8%           | 99.9%            | 99.8%            |
| 5' -TCAN <sub>6</sub> TRCC-3'<br>3' -AGTN <sub>6</sub> AYGG-5' | m6A           | 100%            | 99.8%            | 100%             |
| 5' -ATGN <sub>6</sub> CCT-3'<br>3' -TACN <sub>6</sub> GGA-5'   | m6A           | 99.6%           | 99.6%/<br>99.0%  | 99.4%            |

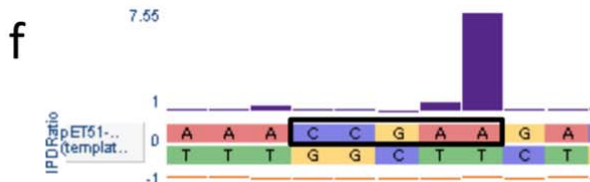

**g**

| Motif | Total in Genome | # in Coding Region | % in Coding Region | # in non-Coding Region | % in non-Coding Region | Positive Strand | Negative Strand | Observed # Motifs | Expected # Motifs | Percent (obs/exp) |
|-------|-----------------|--------------------|--------------------|------------------------|------------------------|-----------------|-----------------|-------------------|-------------------|-------------------|
| CCGAA | 2270            | 1284               | 56.6               | 986                    | 43.4                   | 1130            | 1140            | 2270              | 2488              | 91.2              |

**h**

| Motif         | Modified Position | Modification Type | % Motifs Detected | # Of Motifs Detected | # Of Motifs In Genome | Mean Modification QV | Mean Motif Coverage | Partner Motif |
|---------------|-------------------|-------------------|-------------------|----------------------|-----------------------|----------------------|---------------------|---------------|
| GATC          | 2                 | m6A               | 100.00            | 52                   | 52                    | 3133.6               | 6774.7              | GATC          |
| CCGAA         | 5                 | m6A               | 100.00            | 19                   | 19                    | 2272.1               | 6439.1              |               |
| Not Clustered | 0                 |                   | 4.89              | 713                  | 14,587                | 68.7                 | 6457.9              |               |

**Supplementary Figure 1 – Summary of SMRT genome and methylome analysis of all five *modA* ON/OFF strain pairs.** Each separate strain is summarized together in a single composite image on a single page, which each panel in each summary page corresponding to the following legend - **a**) summary of the size of each SMRT sequenced genome is given for each strain pair (*modA* ON and *modA::kan*). The ON genome for strains 723, C486, 477 and 1209 was annotated and submitted to NCBI Genbank as indicated in the main text; **b**) table summarizing all the methyltransferase activities detectable in each genome, with % values in each table referring to the % methylation detected in that strain for the particular motif reported. The relevant methyltransferase signature corresponding to ModA is highlighted with a thick black box. For strain 723 (*modA2*; fifth composite panel) we also carried out SMRT sequencing of the OFF genome, and a summary of methyltransferase activities detected in this strain is also given in this table; **c**) and **d**) An example of the statistical scores in the ON (**c**) compared with the *kan* (**d**) strain for the motif assigned for that particular ModA protein compared with the *dam* methyltransferase (GATC), showing that methylation is detectable in the *modA::kan* strains; **e**) the sequence recognized by each ModA protein represented as a weblogo consensus sequence; **f**) a typical example of the motif in each genome with inter pulse duration (IPD) score (or plasmid vector for the ModA2 methyltransferase) shown, with the size of the IPD directly proportional to the size of the bar <sup>1</sup>; **g**) shows results of bioinformatics analysis of each ON genome showing statistics for the relevant ModA motif; and panel **h**), for 723 (*modA2*) only, shows results from sequencing of plasmid vector over-expressing ModA2 – the number of ModA2 CCGAA motifs and the number of Dam GATC motifs is shown compared to the number detected as methylated.

# Supplementary Figure 2

Fig

BHK BEFTA-TRACK ALIGNMENTS-mean  
Thursday, 13 March 2014 10:25 AM

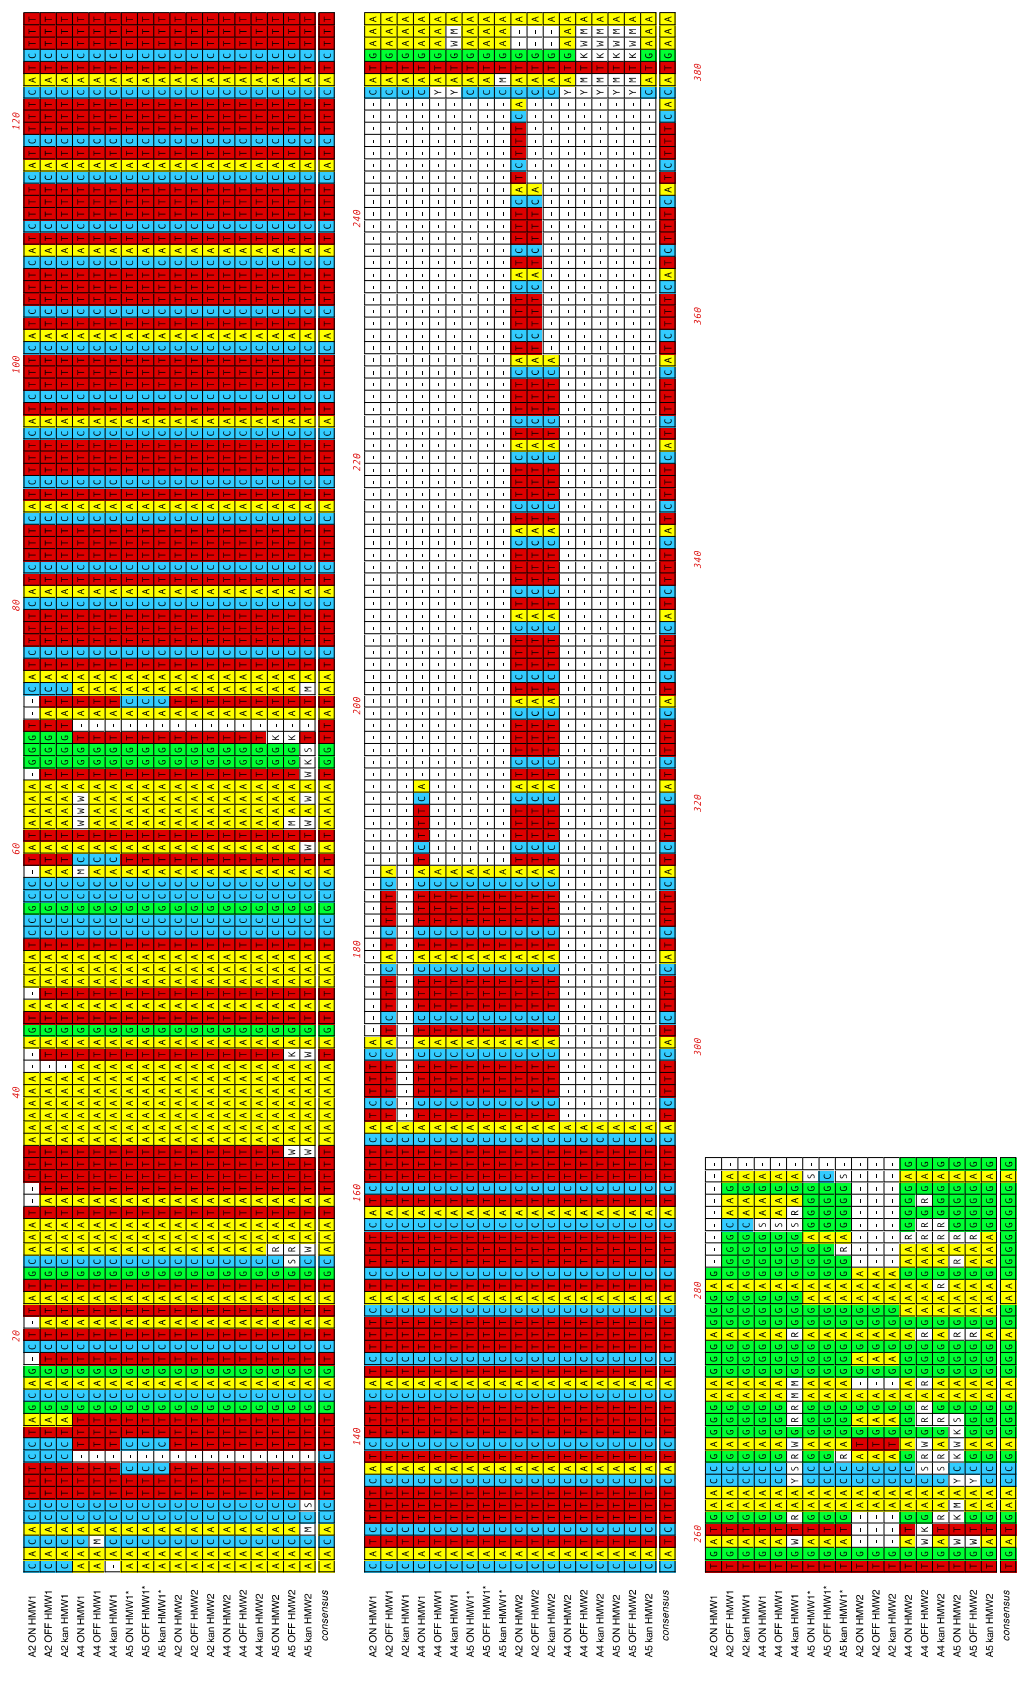

**Supplementary Figure 2 – Clustal W alignments for HMW1A and HMW2A promoter regions from ON, OFF and *kan* strain sets from strains 723 (*modA2*), C486 (*modA4*) and 477 (*modA5*).** Results of sequencing over HMW promoter regions encompassing the heptanucleotide repeat tracts, and aligned using MacVector version 11.0.2.



### Supplementary Figure 3

#### a) Differential expression in 723 *modA2*

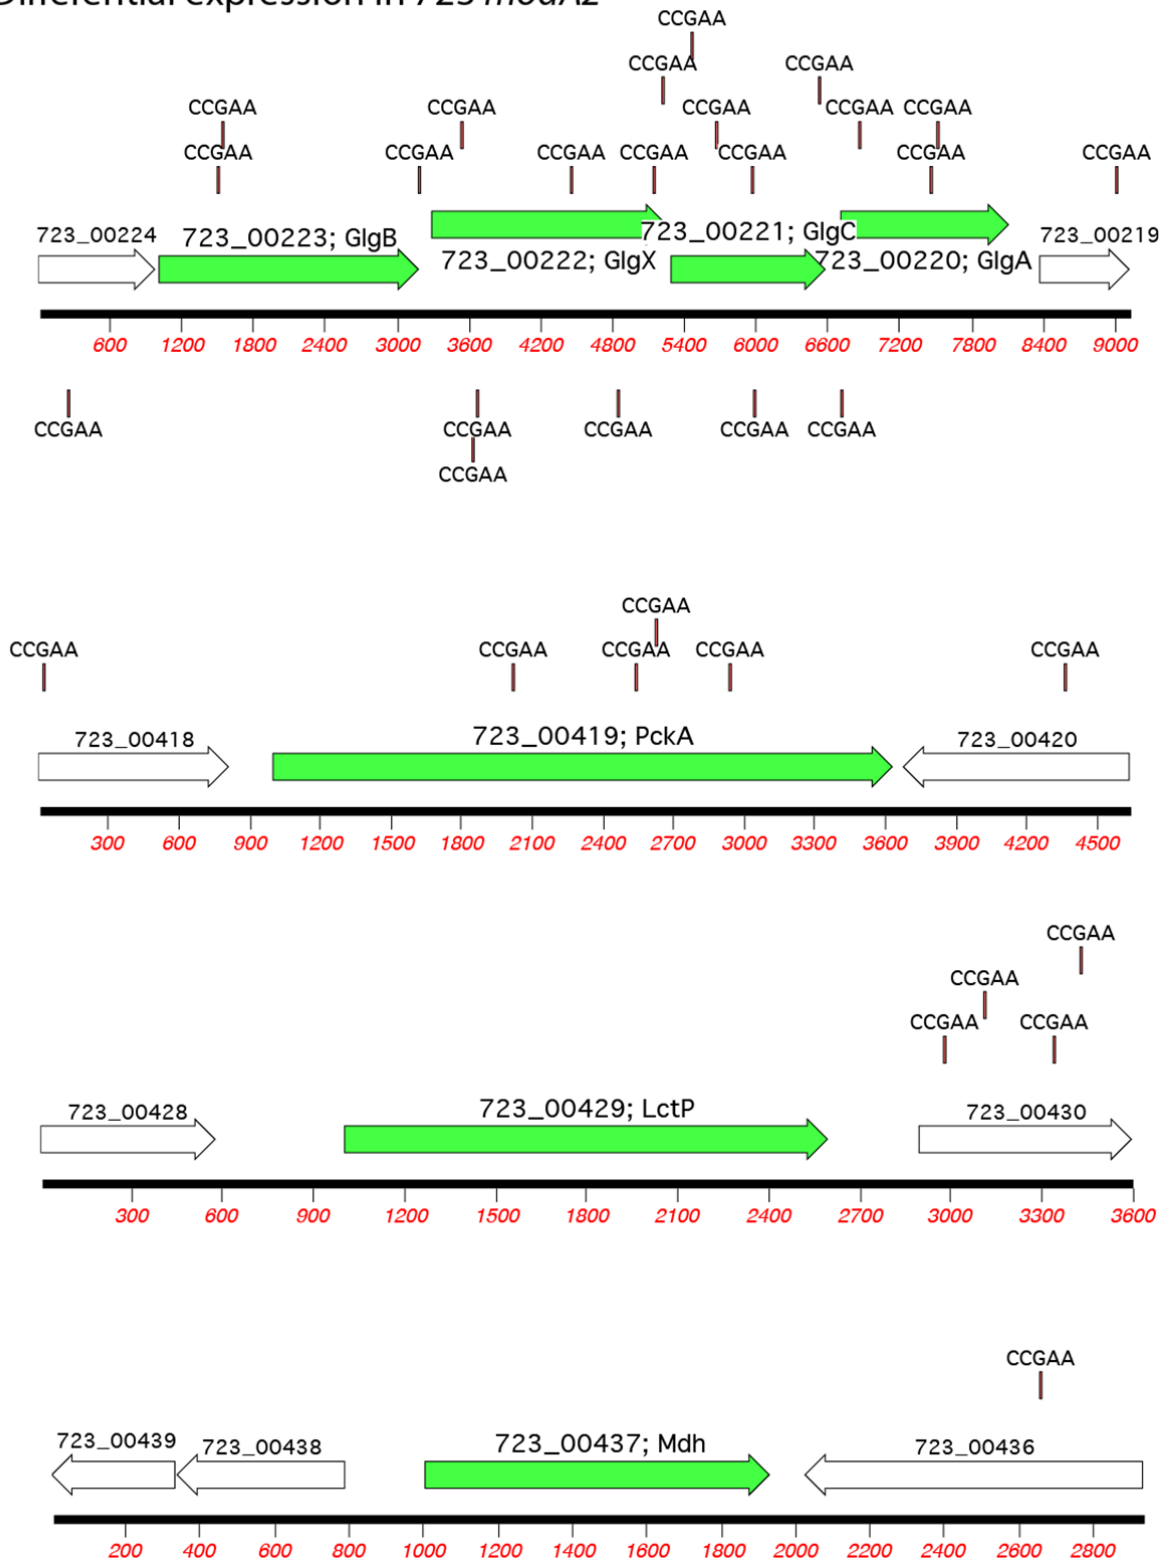

a) Differential expression in 723 *modA2* (continued)

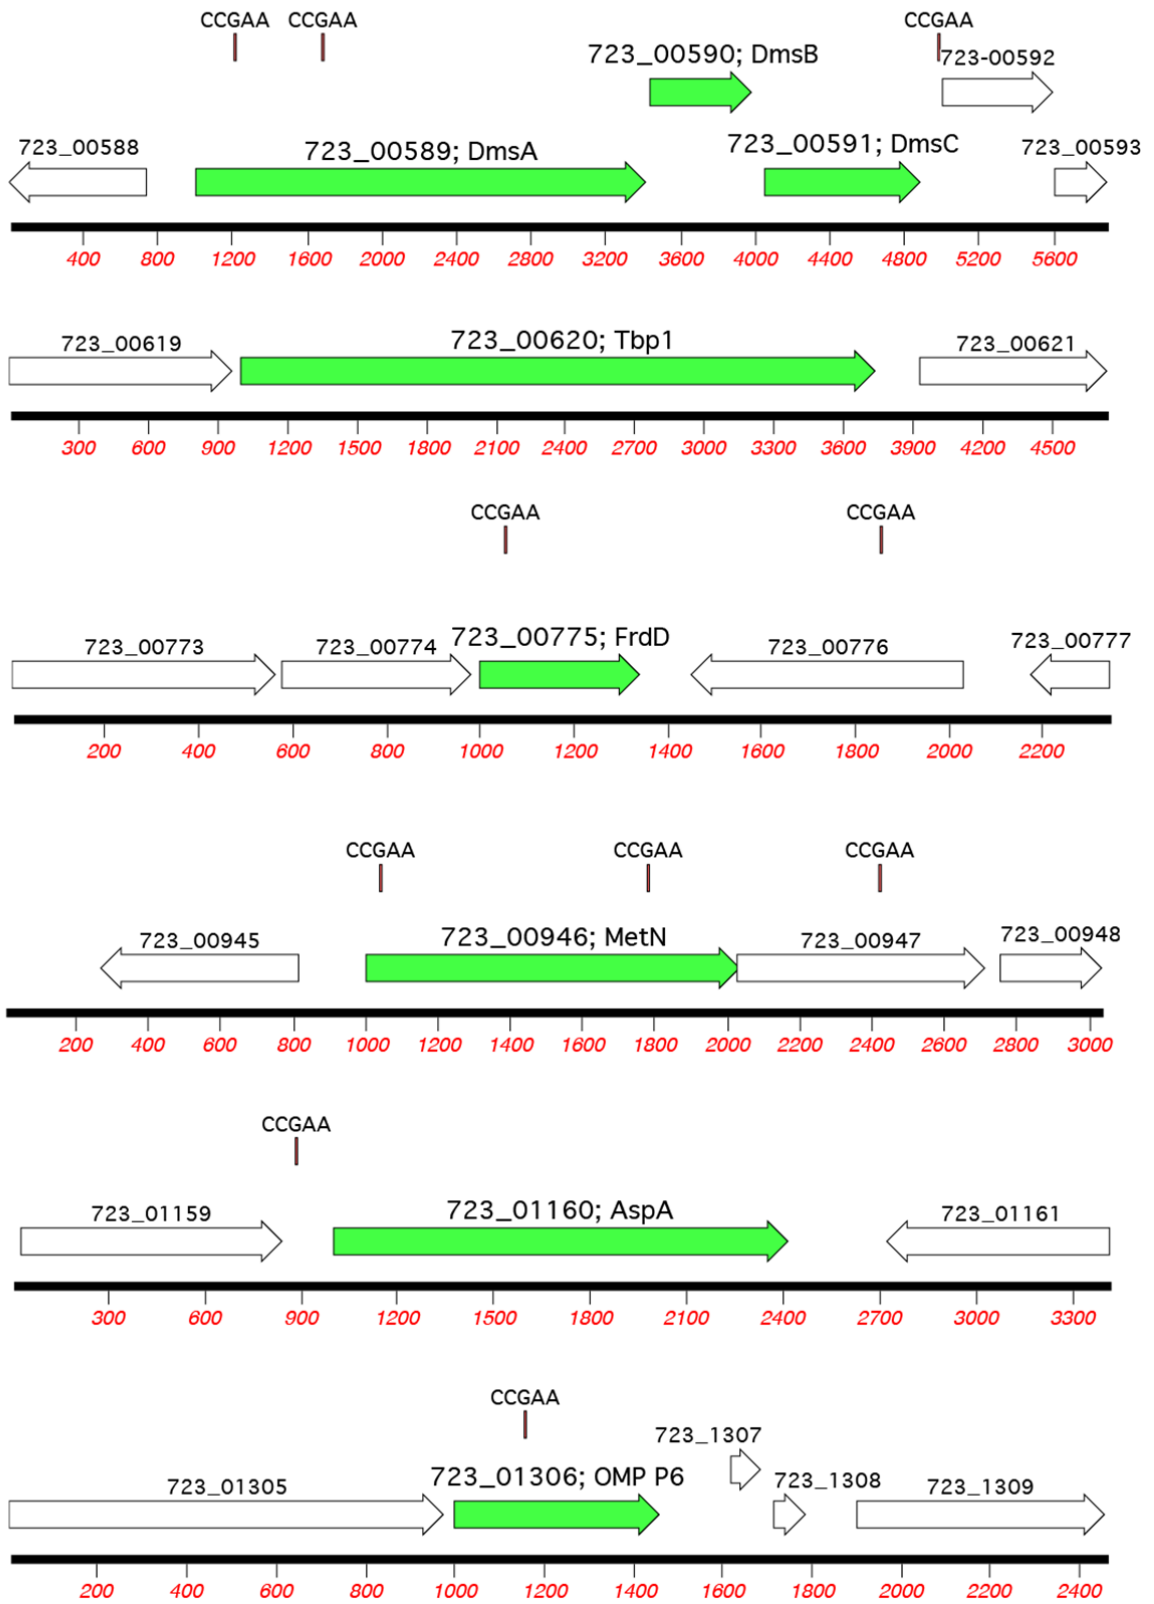

a) Differential expression in 723 *modA2* (continued)

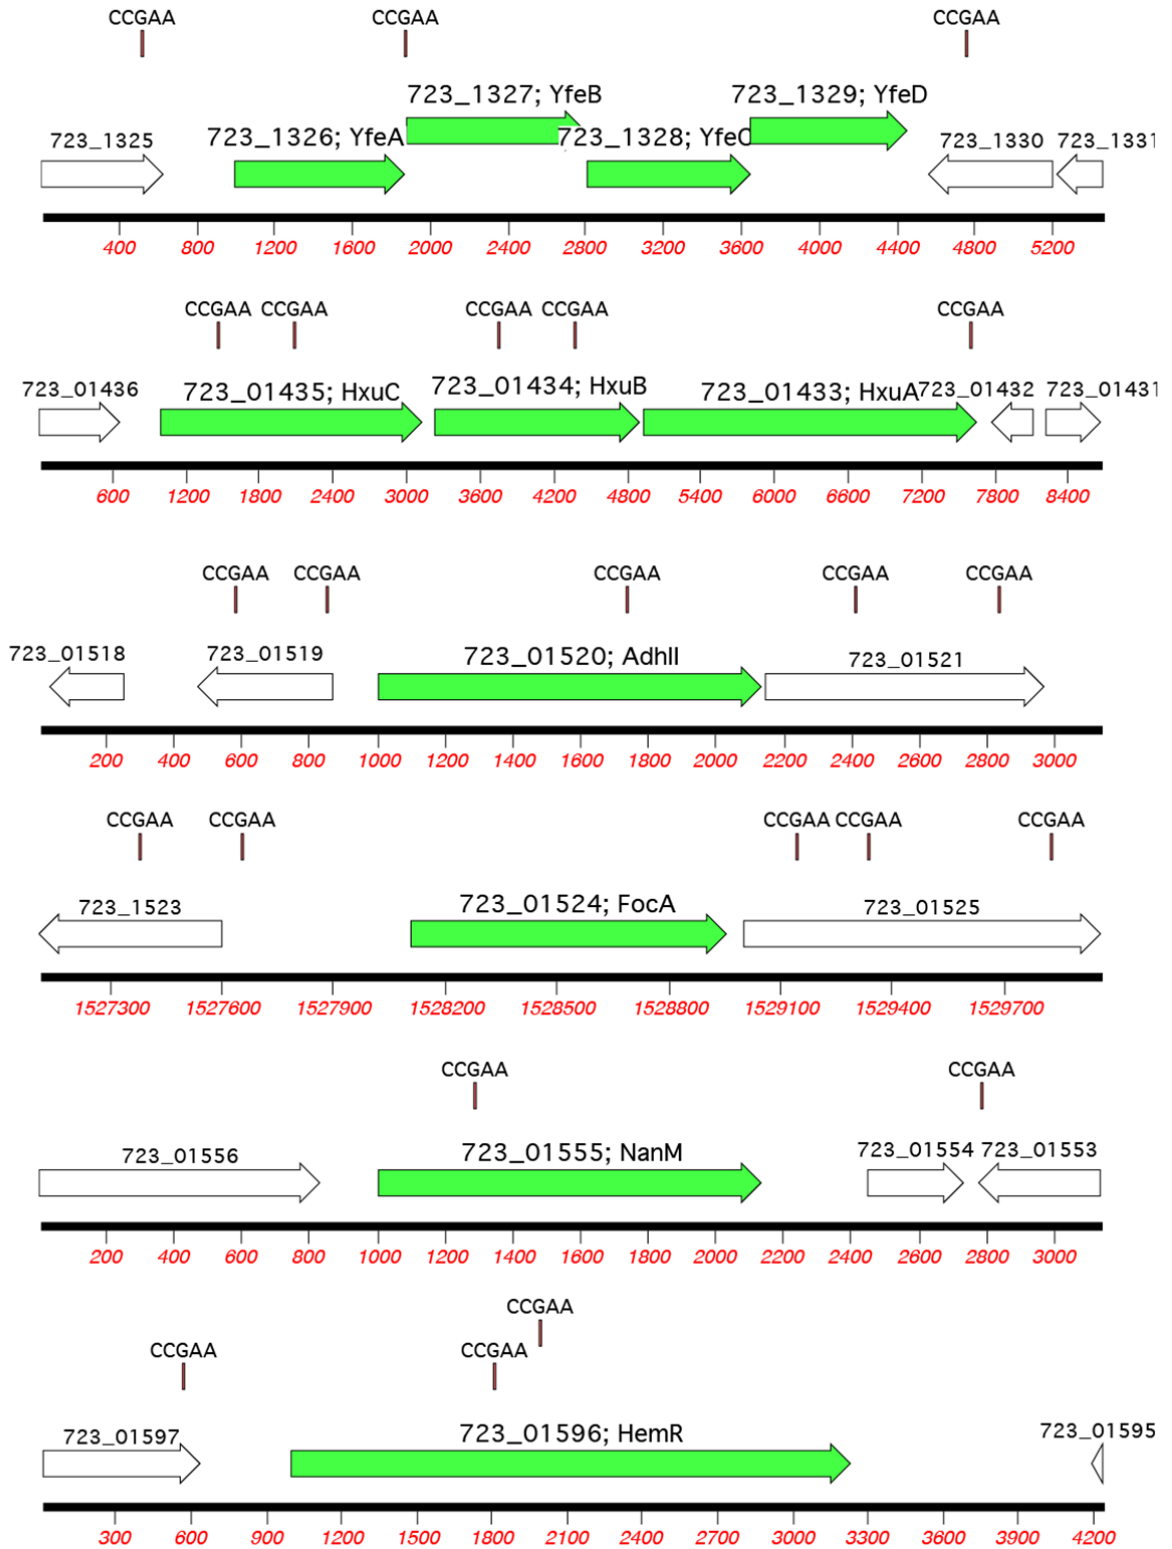

a) Differential expression in 723 *modA2* (continued)

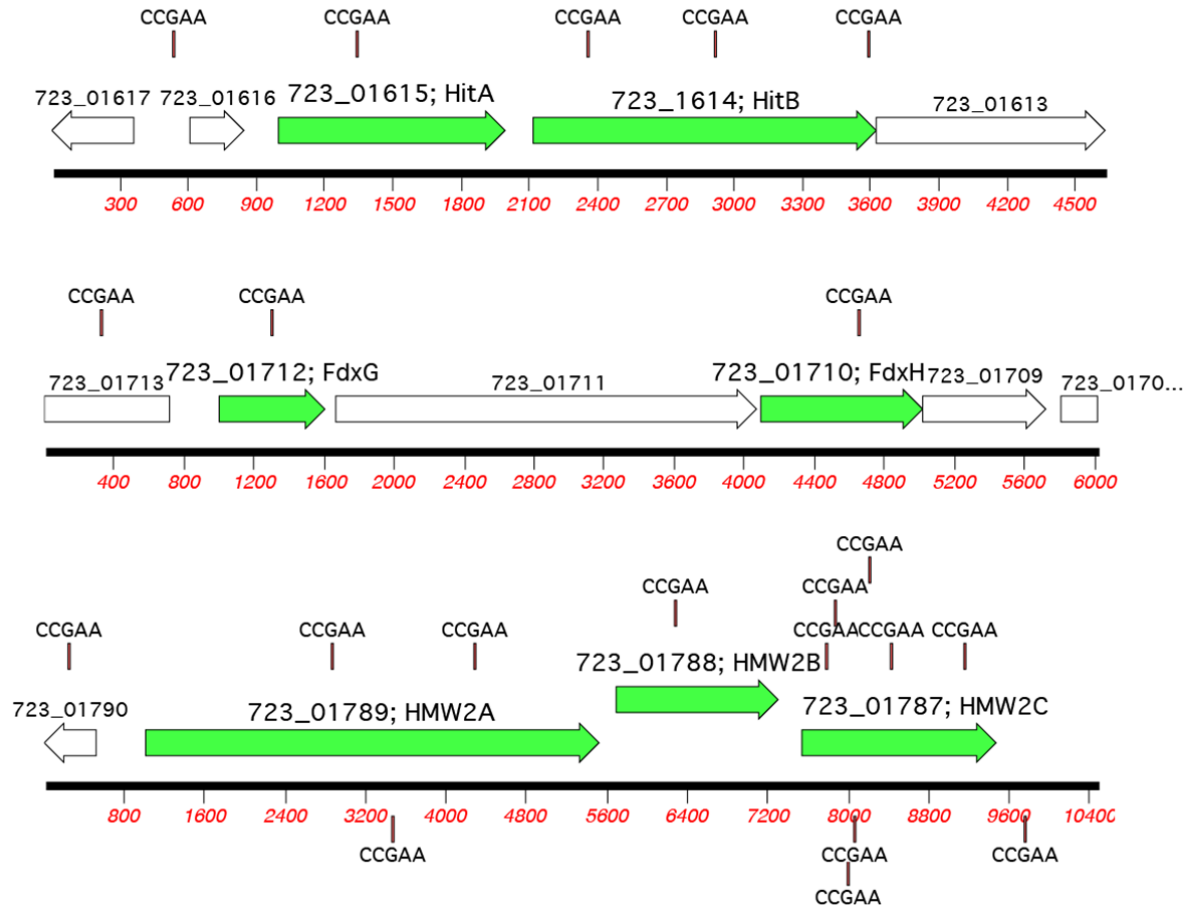

b) Differential expression in C486 *modA4*

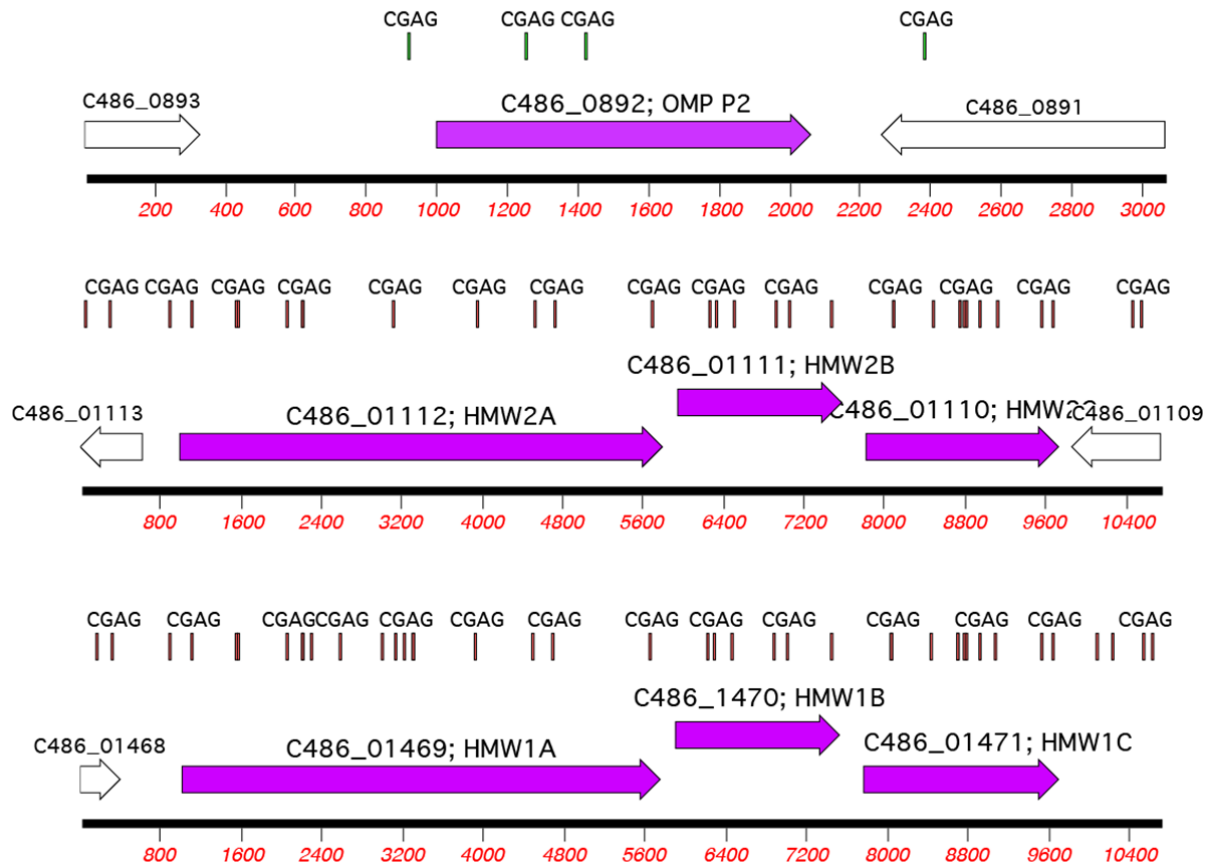

c) Differential expression in 477 *modA5*

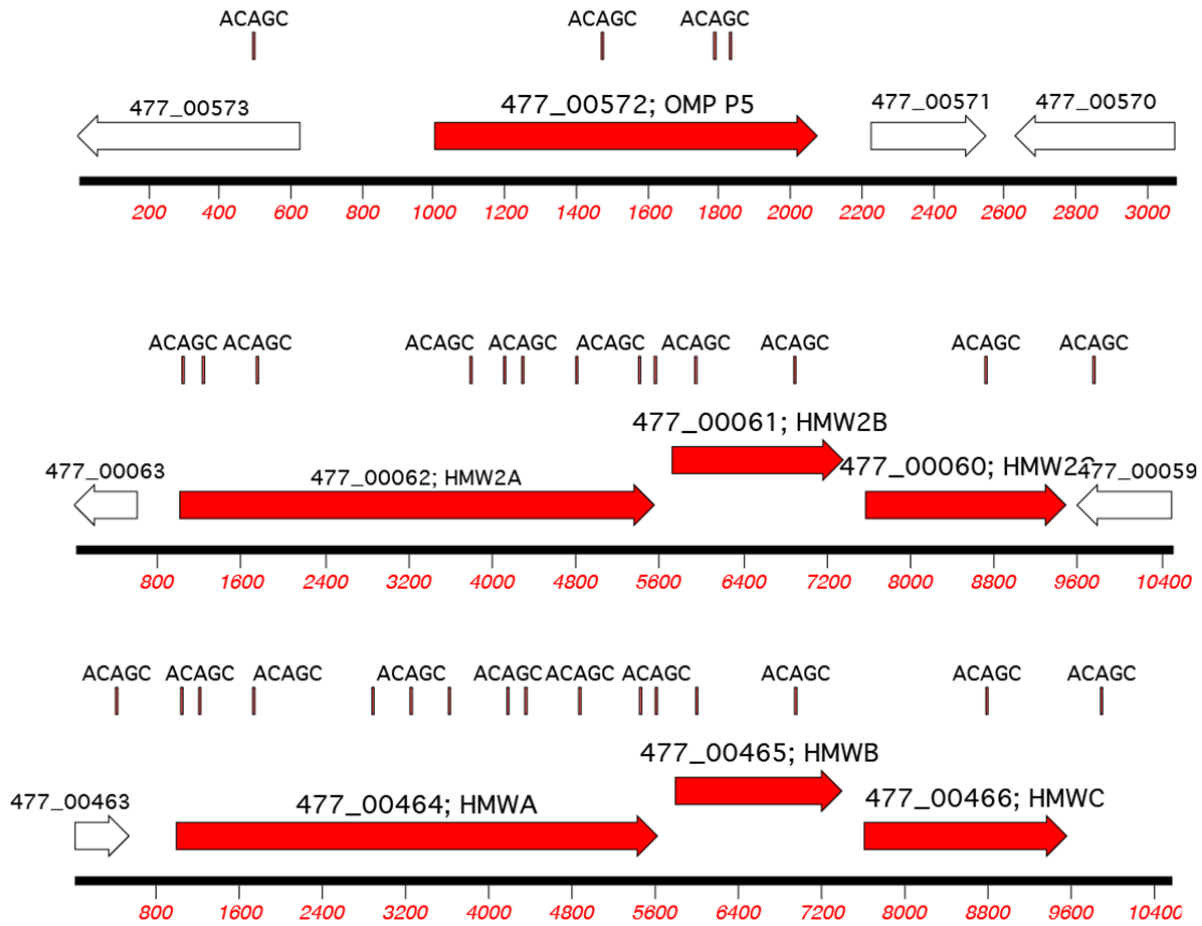

d) Differential expression in R2866 *modA10*

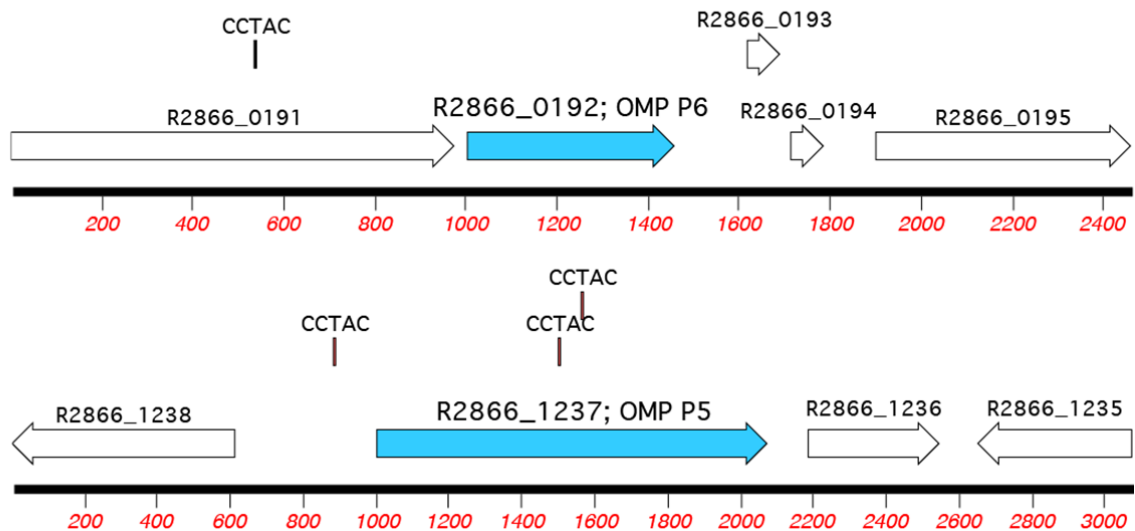

**Supplementary Figure 3 – position of ModA recognition sites in relation to genes/proteins shown to be differentially regulated in *modA* ON / OFF pairs.** Genes/proteins were noted as differentially expressed by iTRAQ and/or microarray. Differentially expressed gene sequences and 1000bp upstream were taken from our annotated SMRT derived genomes/NCBI GenBank. ModA recognition sequences are noted by bars above and below the sequence (ModA2 = CCGAA; ModA4 = CGAG; ModA5 = ACAGC; and ModA10 = CCTAC). Genes of interest are represented as coloured arrows, with the locus tag and gene designation given above. Flanking elements are represented as white arrows. All genes and ModA recognition sequence locations from **a)** NTHi strain 723 (*modA2*); **b)** NTHi strain C486 (*modA4*); **c)** NTHi strain 477 (*modA5*) and **d)** NTHi strain R2866 (*modA10*).

## Supplementary Figure 4

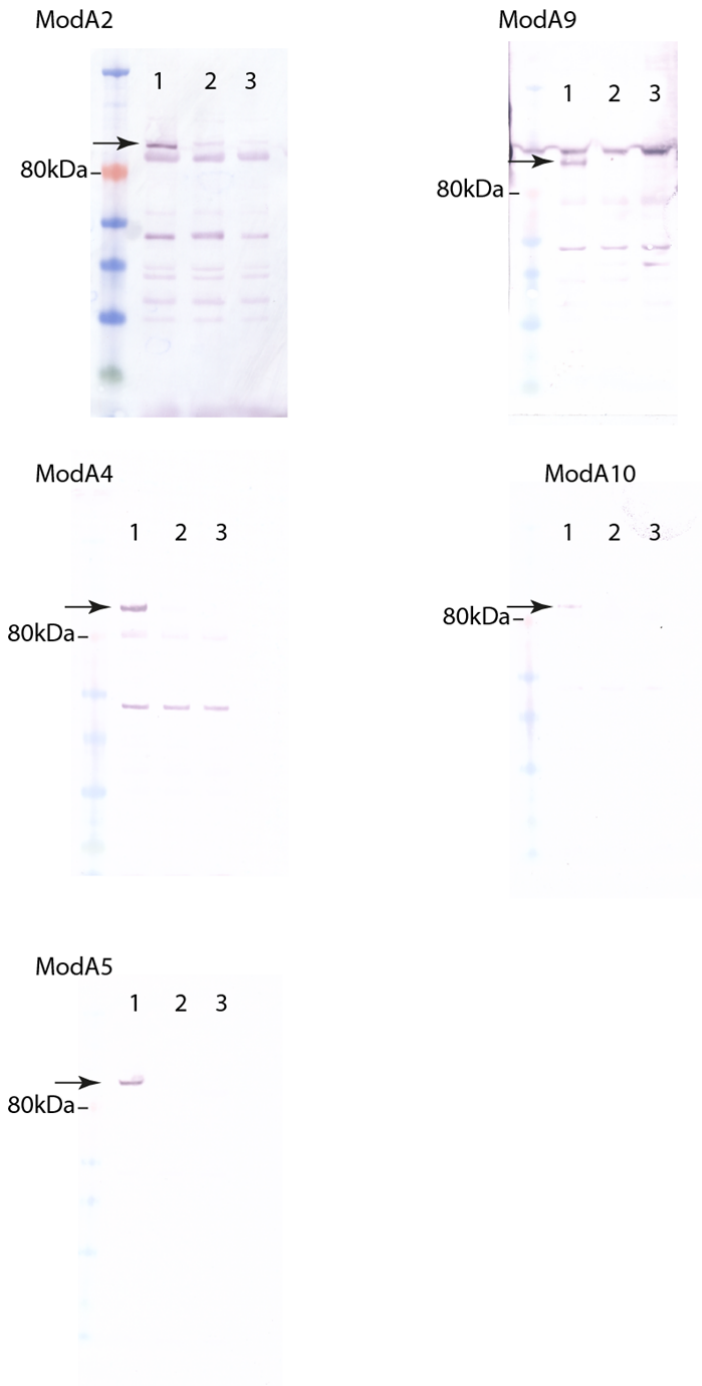

**Supplementary Figure 4 – full anti-ModA western blots for NTHi strains 723 (ModA2), C486 (ModA4), 477 (ModA5) 1209 (ModA9) and R2866 (ModA10).** Each blot is presented in full. Order is as presented in Figure 2; for all blots – lane 1 = ON; lane 2 = OFF; lane 3 = kanamycin knock-out strain. The band corresponding to ModA is highlighted with an arrow



## Supplementary Figure 5

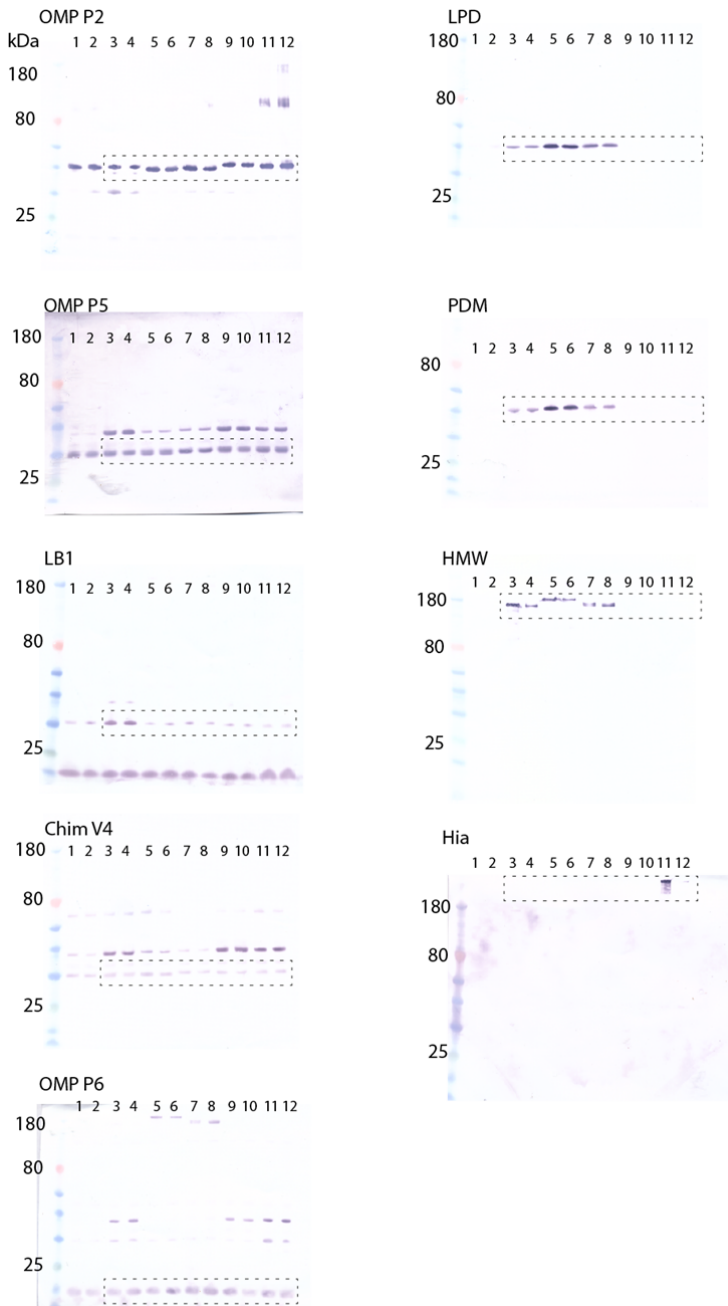

**Supplementary Figure 5 – full western blots for all vaccine candidates using outer-membrane protein preparations in Figure 3.** Blots are shown in full, with the representative section containing the protein of interest presented in Figure 3 boxed for clarity. Molecular weight of protein marker bands is shown to the left of each blot. The first two lanes (1&2) in all blots contain samples from *H. influenzae* strain Rd KW20, that is not considered in this work; lanes 3&4 = *modA2* ON&OFF; lanes 5&6 = *modA4* ON&OFF; lanes 6&7 = *modA5* ON&OFF; lanes 8&9 = *modA9* ON&OFF; lanes 11&12 = *modA10* ON&OFF

**Supplementary Table 1 – strain collection data for NTHi *modA* allele distribution presented in Fig. 1c & 1d.** NS = nasopharyngeal swab; MEE = middle ear exudate; OM = otitis media

| <b>Data for Figure 1c</b> |                      |                     |                          |                                  |
|---------------------------|----------------------|---------------------|--------------------------|----------------------------------|
| <b>NTHi isolate</b>       | <b>Disease state</b> | <b>Source fluid</b> | <b><i>mod</i> allele</b> | <b>source</b>                    |
| 001                       | OM prone             | NS                  | A4                       | Novotny et al, 2009 <sup>2</sup> |
| 002                       | OM prone             | NS                  | A7                       | Novotny et al, 2009 <sup>2</sup> |
| 006                       | OM prone             | NS                  | A5                       | Novotny et al, 2009 <sup>2</sup> |
| 013                       | OM prone             | NS                  | A3                       | Novotny et al, 2009 <sup>2</sup> |
| 017                       | OM prone             | NS                  | A4                       | Novotny et al, 2009 <sup>2</sup> |
| 043                       | OM prone             | NS                  | A8                       | Novotny et al, 2009 <sup>2</sup> |
| 047                       | OM prone             | NS                  | A14                      | Novotny et al, 2009 <sup>2</sup> |
| 050                       | OM prone             | NS                  | A3                       | Novotny et al, 2009 <sup>2</sup> |
| 052                       | OM prone             | NS                  | A7                       | Novotny et al, 2009 <sup>2</sup> |
| 059                       | OM-prone             | NS                  | A7                       | Novotny et al, 2009 <sup>2</sup> |
| 062                       | OM-prone             | NS                  | A9                       | Novotny et al, 2009 <sup>2</sup> |
| 067                       | OM-prone             | NS                  | A5                       | Novotny et al, 2009 <sup>2</sup> |
| 069                       | OM prone             | NS                  | A8                       | Novotny et al, 2009 <sup>2</sup> |
| 078                       | OM prone             | NS                  | A7                       | Novotny et al, 2009 <sup>2</sup> |
| 081                       | OM prone             | NS                  | A8                       | Novotny et al, 2009 <sup>2</sup> |
| 089                       | OM prone             | NS                  | A10                      | Novotny et al, 2009 <sup>2</sup> |
| 093                       | OM prone             | NS                  | A8                       | Novotny et al, 2009 <sup>2</sup> |
| 094                       | OM prone             | NS                  | A7                       | Novotny et al, 2009 <sup>2</sup> |
| 138                       | OM prone             | NS                  | A8                       | Novotny et al, 2009 <sup>2</sup> |
| 140                       | OM prone             | NS                  | A2                       | Novotny et al, 2009 <sup>2</sup> |
| 151                       | OM prone             | NS                  | A10                      | Novotny et al, 2009 <sup>2</sup> |
| 174                       | OM prone             | NS                  | A3                       | Novotny et al, 2009 <sup>2</sup> |
| 178                       | OM-prone             | NS                  | A10                      | Novotny et al, 2009 <sup>2</sup> |
| 182                       | OM-prone             | NS                  | A5                       | Novotny et al, 2009 <sup>2</sup> |
| 189                       | OM-prone             | NS                  | A10                      | Novotny et al, 2009 <sup>2</sup> |
| 020 L                     | OM prone             | MEE                 | A10                      | Novotny et al, 2009 <sup>2</sup> |
| 040 L                     | OM prone             | MEE                 | A3                       | Novotny et al, 2009 <sup>2</sup> |
| 075 R                     | OM prone             | MEE                 | A8                       | Novotny et al, 2009 <sup>2</sup> |
| 177 L                     | OM prone             | MEE                 | A2                       | Novotny et al, 2009 <sup>2</sup> |
| 182 L                     | OM prone             | MEE                 | A5                       | Novotny et al, 2009 <sup>2</sup> |
| 189 L                     | OM prone             | MEE                 | A10                      | Novotny et al, 2009 <sup>2</sup> |
| 187 L                     | OM prone             | MEE                 | A7                       | Novotny et al, 2009 <sup>2</sup> |
| <b>Data for Figure 1d</b> |                      |                     |                          |                                  |
| <b>NTHi isolate</b>       | <b>Disease state</b> | <b>Source fluid</b> | <b><i>mod</i> allele</b> | <b>source</b>                    |
| 314                       | Healthy              | NS                  | A14                      | this study                       |
| 341                       | Healthy              | NS                  | A3                       | this study                       |
| 353                       | Healthy              | NS                  | A13                      | this study                       |
| 354                       | Healthy              | NS                  | A13                      | this study                       |
| 355                       | Healthy              | NS                  | A4                       | this study                       |
| 359                       | Healthy              | NS                  | A7                       | this study                       |

|       |         |    |     |            |
|-------|---------|----|-----|------------|
| 389   | Healthy | NS | A4  | this study |
| 390   | Healthy | NS | A10 | this study |
| 395   | Healthy | NS | A2  | this study |
| 396   | Healthy | NS | A2  | this study |
| 397   | Healthy | NS | A7  | this study |
| 398   | Healthy | NS | A9  | this study |
| 402   | Healthy | NS | A2  | this study |
| 412   | Healthy | NS | A4  | this study |
| 414   | Healthy | NS | A4  | this study |
| 452   | Healthy | NS | A8  | this study |
| 484   | Healthy | NS | A9  | this study |
| 490   | Healthy | NS | A10 | this study |
| 491   | Healthy | NS | A20 | this study |
| 497   | Healthy | NS | A10 | this study |
| 503   | Healthy | NS | A10 | this study |
| 515 R | Healthy | NS | A21 | this study |
| 518 R | Healthy | NS | A2  | this study |
| 525 R | Healthy | NS | A10 | this study |
| 530 L | Healthy | NS | A10 | this study |
| 538 L | Healthy | NS | A8  | this study |
| 574 R | Healthy | NS | A10 | this study |
| 577 L | Healthy | NS | A4  | this study |
| 578 L | Healthy | NS | A4  | this study |
| 591 L | Healthy | NS | A8  | this study |
| 593 R | Healthy | NS | A10 | this study |
| 597 R | Healthy | NS | A8  | this study |
| 615 L | Healthy | NS | A10 | this study |
| 624 R | Healthy | NS | A2  | this study |
| 630 R | Healthy | NS | A9  | this study |
| 639 L | Healthy | NS | A9  | this study |
| 652 L | Healthy | NS | A9  | this study |

**Supplementary Table 2 – Minimal Inhibitory Concentration (MIC) data for a number of clinically relevant antibiotics used to treat NTHi infections**

\* MIC was based on previous studies with *H. influenzae*<sup>3-6</sup>. MICs (mg/L) are reported as the last well in which turbidity was observed following overnight growth

| Antibiotics<br>(MIC<br>range)* | 723 <i>modA2</i> |       | C486 <i>modA4</i> |       | 477 <i>modA5</i> |       | 1209 <i>modA9</i> |       | R2866 <i>modA10</i> |       |
|--------------------------------|------------------|-------|-------------------|-------|------------------|-------|-------------------|-------|---------------------|-------|
|                                | ON               | OFF   | ON                | OFF   | ON               | OFF   | ON                | OFF   | ON                  | OFF   |
| Ampicillin<br>(≤0.5->512)      | 0.313            | 0.625 | 0.625             | 0.625 | 0.625            | 0.625 | 0.313             | 0.313 | >200                | >200  |
| Azithromycin<br>(0.03-32)      | 0.625            | 0.625 | 0.156             | 0.156 | 0.313            | 0.313 | 0.156             | 0.156 | 0.625               | 0.625 |
| Amoxicillin<br>(0.03-16)       | 0.39             | 0.39  | 0.39              | 0.39  | 0.39             | 0.39  | 0.39              | 0.39  | >250                | >250  |
| Ciprofloxacin<br>(0.12-32)     | 0.008            | 0.008 | 0.008             | 0.008 | 0.008            | 0.008 | 0.004             | 0.004 | 0.008               | 0.008 |
| Clindamycin<br>(0.03-16)       | 3.125            | 3.125 | 0.781             | 0.781 | 0.781            | 0.781 | 1.563             | 1.563 | 1.563               | 1.563 |
| Erythromycin<br>(0.5-8)        | 5                | 5     | 1.25              | 1.25  | 5                | 2.5   | 2.5               | 2.5   | 5                   | 5     |
| Gentamicin<br>(≤4)             | 2.5              | 2.5   | 1.25              | 1.25  | 1.25             | 1.25  | 5                 | 5     | 5                   | 2.5   |
| Nalidixic<br>Acid<br>(2≤)      | 0.625            | 0.625 | 0.313             | 0.313 | 0.625            | 0.625 | 0.313             | 0.313 | 0.625               | 0.625 |

**Supplementary Table 3 – genes showing > 1.4 fold up or down regulation and that are statistically significant (B-Stat >0) microarray data for the *modA2ON* / *kan* pair.** § Gene expression was confirmed by quantitative RT-PCR in NTHi strain 723 *modA2ON* and 723 *modA2OFF* strain variants. # identified by both microarray and iTRAQ.

| Gene                                                                                   | Microarray ID | Description                                               | Ratio | QRT-PCR                  | B-Stat |
|----------------------------------------------------------------------------------------|---------------|-----------------------------------------------------------|-------|--------------------------|--------|
| <b>Reduced expression in the <i>H. influenzae</i> strain 723 <i>modA2</i> mutant</b>   |               |                                                           |       |                          |        |
| 723_00381                                                                              | Hflu203000743 | hypothetical                                              | -1.46 |                          | 1.15   |
| 723_00559                                                                              | HI1080        | Amino-acid ABC transporter binding protein <i>tcyA</i>    | -1.47 |                          | 3.22   |
| 723_01712                                                                              | NTHI0007      | Formate dehydrogenase major subunit <i>fdxG</i>           | -1.50 |                          | 2.77   |
| 723_01520                                                                              | Hflu203001461 | Alcohol dehydrogenase, class III                          | -1.53 |                          | 2.42   |
| 723_01710                                                                              | NTHI0010      | Formate dehydrogenase, iron-sulfur subunit <i>fdxH</i>    | -1.53 |                          | 1.66   |
| 723_00560                                                                              | HI1079        | Amino acid ABC transporter permease <i>tcyB</i>           | -1.62 |                          | 2.92   |
| 723_00947                                                                              | HI0620.1      | Methionine transport permease <i>metI</i>                 | -1.78 |                          | 4.24   |
| 723_00429                                                                              | Hflu103001790 | L-lactate permease <i>lctP</i>                            | -1.79 |                          | 3.08   |
| 723_00946                                                                              | Hflu203000185 | DL-methionine transporter ATP-binding subunit <i>metN</i> | -1.96 | -3.56±0.741 <sup>§</sup> | 4.80   |
| <b>Increased expression in the <i>H. influenzae</i> strain 723 <i>modA2</i> mutant</b> |               |                                                           |       |                          |        |
| 723_01433                                                                              | ORF02024      | Heme/hemopexin-binding precursor <i>hxuA</i>              | 1.45  |                          | 0.86   |
| 723_01175                                                                              | Hflu203001806 | Nucleoside permease <i>nupC</i>                           | 1.47  |                          | 0.59   |
| 723_00220                                                                              | NTHI1806      | Glycogen synthase <i>glgA</i>                             | 1.49  |                          | 1.84   |
| 723_01174                                                                              | Hflu203001807 | Pyruvate-formate lyase-activating enzyme                  | 1.49  |                          | 3.11   |
| 723_01557                                                                              | Hflu203001418 | Sialic acid transporter <i>siaP</i>                       | 1.50  |                          | 1.86   |
| 723_00403                                                                              | Hflu203000922 | ABC-type Co <sup>2+</sup> transport system <i>cbiK</i>    | 1.51  |                          | 1.44   |
| 723_00222                                                                              | NTHI1808      | Glycogen debranching enzyme <i>glgX</i>                   | 1.52  |                          | 1.27   |
| 723_01160                                                                              | HI0534        | Aspartate ammonia-lyase <i>aspA</i>                       | 1.52  |                          | 2.66   |
| 723_01189                                                                              | Hflu103000707 | Ribose ABC transporter <i>rbsC</i>                        | 1.53  |                          | 1.58   |
| 723_00776                                                                              | ORF01899      | Fumarate reductase subunit D <i>frdD</i>                  | 1.56  |                          | 0.89   |
| 723_01524                                                                              | HI0181        | Formate transporter <i>focA</i>                           | 1.57  |                          | 1.14   |
| 723_01327                                                                              | Hflu203001649 | Iron (chelated) ABC transporter <i>yfeB</i>               | 1.61  |                          | 1.32   |
| 723_00221                                                                              | NTHI1807      | Glucose-1-phosphate adenylyltransferase <i>glgC</i>       | 1.61  |                          | 3.76   |
| 723_00223                                                                              | NTHI1809      | Glycogen branching enzyme <i>glgB</i>                     | 1.66  |                          | 2.21   |
| 723_00419                                                                              | HI0809        | Phosphoenolpyruvate carboxykinase <i>pckA</i>             | 1.69  |                          | 1.00   |
| 723_01614                                                                              | ORF00565      | Iron (III) ABC transporter, permease protein <i>hitB</i>  | 1.75  |                          | 4.39   |
| 723_01621                                                                              | Hflu203001380 | Glycerate kinase                                          | 1.81  |                          | 5.06   |
| 723_01328                                                                              | Hflu203001648 | Iron chelated ABC transporter permease <i>yfeC</i>        | 1.90  |                          | 1.69   |
| 723_01329                                                                              | Hflu203001647 | Iron chelated ABC transporter permease <i>yfeD</i>        | 2.08  |                          | 3.98   |
| 723_00591                                                                              | Hflu203000516 | Anaerobic DMSO chain C <i>dmsC</i>                        | 2.09  |                          | 1.26   |
| 723_01434                                                                              | Hflu103000469 | Heme/hemopexin-binding <i>hxuB</i>                        | 2.14  |                          | 1.15   |
| 723_01620                                                                              | NTHI0171      | Gluconate family permease                                 | 2.14  |                          | 5.90   |
| 723_01326                                                                              | Hflu203001650 | Iron chelated ABC transporter <i>yfeA</i>                 | 2.17  | 2.166±0.667 <sup>§</sup> | 5.83   |
| 723_00589                                                                              | Hflu203000518 | Anaerobic DMSO chain A <i>dmsA</i>                        | 2.22  | 2.14±0.839 <sup>§</sup>  | 2.38   |
| 723_00437                                                                              | HI1210        | Malate dehydrogenase <i>mdh</i>                           | 2.28  |                          | 5.50   |
| 723_00590                                                                              | Hflu203000517 | Anaerobic DMSO chain B <i>dmsB</i>                        | 2.65  |                          | 2.67   |
| 723_01615                                                                              | Hflu203001388 | Iron-utilization <i>hitA</i>                              | 4.04  | 2.08±0.397 <sup>§</sup>  | 4.72   |

**Supplementary Table 4**

| ANIMAL                                  | EAR | Day  |      |      |       |       |      |      |      |
|-----------------------------------------|-----|------|------|------|-------|-------|------|------|------|
|                                         |     | 0.0  | 2.0  | 4.0  | 7.0   | 10.0  | 14.0 | 18.0 | 22.0 |
| <i>modA2(22)ON - all numbers = %ON</i>  |     |      |      |      |       |       |      |      |      |
| #157                                    | L   | 87.9 |      |      | 82.9  | 90.6  |      |      | #    |
|                                         | R   |      |      | 84.1 | 81.1  | 100.0 |      |      | #    |
| #160                                    | L   | 87.9 |      | 56.5 | 80.3  |       |      |      | #    |
|                                         | R   |      |      |      |       |       |      |      | #    |
| #163                                    | L   | 87.9 |      | 82.8 | 81.3  | 77.2  | #    | #    | #    |
|                                         | R   |      |      |      | 85.0  | 75.7  | #    | #    | #    |
| #167                                    | L   | 87.9 |      | 84.8 | #     |       |      |      |      |
|                                         | R   |      |      | 83.3 | 84.0  |       |      |      |      |
| #171                                    | L   | 87.9 |      | 84.6 | 83.1  | #     |      |      | #    |
|                                         | R   |      |      | 84.1 | 84.0  |       | #    | #    |      |
| #166                                    | L   | 84.4 |      | 49.0 |       |       |      |      |      |
|                                         | R   |      |      | 88.9 |       |       |      |      |      |
| #181                                    | L   | 84.4 |      |      |       |       |      |      |      |
|                                         | R   |      | #    | 76.8 |       |       |      |      |      |
| #183                                    | L   | 84.4 |      | 76.6 |       |       |      |      |      |
|                                         | R   |      |      | #    |       |       |      |      |      |
| #185                                    | L   | 84.4 |      | 82.4 | 80.2  | #     | 64.2 | 80.6 | 70.0 |
|                                         | R   |      |      | #    | 32.0  | 34.5  | 71.1 | 81.1 | #    |
| #190                                    | L   | 84.4 |      | 85.1 |       | 84.7  | 80.5 |      |      |
|                                         | R   |      |      | #    |       | 87.8  | 85.5 |      |      |
| <i>modA2(24)OFF - all numbers = %ON</i> |     |      |      |      |       |       |      |      |      |
| #2                                      | L   | 7.2  |      | 78.0 | 81.3  | 70.8  | #    | #    | #    |
|                                         | R   |      |      | #    | 50.3  | 60.9  | #    | #    | #    |
| #7                                      | L   | 7.2  | 68.0 | #    | 79.3  | 88.4  | 59.0 | #    | #    |
|                                         | R   |      |      | #    | 100.0 | 100.0 | #    | #    | #    |
| #9                                      | L   | 7.2  |      | 5.2  | 56.0  | #     |      |      |      |
|                                         | R   |      |      | 74.0 | 74.1  | 76.8  |      |      |      |
| #16                                     | L   | 7.2  |      |      | 84.3  | 57.0  |      |      |      |
|                                         | R   |      |      | #    | 100.0 | #     |      |      |      |
| #20                                     | L   | 7.2  |      | 78.6 | #     | #     |      |      | #    |
|                                         | R   |      |      |      | 75.9  | 72.7  | #    |      | #    |
| #159                                    | L   | 9.8  |      | 0.0  | 0.0   | 63.9  |      |      |      |
|                                         | R   |      |      |      | 0.0   | 81.1  |      |      |      |
| #161                                    | L   | 9.8  |      | 0.0  | 50.0  |       |      |      |      |
|                                         | R   |      |      |      | 20.8  |       |      |      |      |
| #162                                    | L   | 9.8  |      | 37.6 | 41.7  | 41.1  | 53.0 |      |      |
|                                         | R   |      |      |      | 82.9  | 74.4  | #    |      |      |
| #173                                    | L   | 9.8  |      | 0.0  | #     | #     | #    |      |      |
|                                         | R   |      |      | #    | 0.0   | 0.0   |      |      |      |
| #175                                    | L   | 9.8  |      |      | 60.5  | 65.3  | 47.0 | #    | #    |
|                                         | R   |      |      |      | 90.9  | 51.1  | 61.0 | #    | #    |

**Supplementary Table 4 – Complete fragment analysis data used to generate the heat map presented in Figure 5a.** Data are presented for each animal as the % *modA2ON* in the sample, from both left (L) and right (R) middle ear samples. Data from the inoculum (D+0) and all subsequent days (D+2, 4, 7, 10, 14, 18, and 22) are presented. Day 2 (D+2) is included here even though it is not included in the analysis presented in Figure 5, as only two of the D+2 samples contained sufficient CFU to attempt to generate a PCR product, and only one of these successfully produced a PCR product (animal number 7, left middle ear). White boxes indicate there was insufficient CFU in the sample to generate a PCR product; black boxes indicate the animal died/was sacrificed; # indicates a PCR product could not be generated despite there being sufficient CFU (>1000).

**Supplementary Table 5 – Oligonucleotide primers used in this study**

| <b>Name</b>    | <b>Sequence</b>                                            |
|----------------|------------------------------------------------------------|
| Him1F          | <b>FAM-ATG GCG GAC AAA GCA CCG AAG G</b>                   |
| Him3           | CAA AAA GCC GGT CAA TTT CAT CAA A                          |
| Him6           | GCA GTT TAA AGG TAA AGT TAA GC                             |
| Him11          | TCG TTA AAT GGA GCA AGT TC                                 |
| modA-F         | <u>GAC GAC GAC AAG ATG AAG ACA GAC ATT CAA ACC G</u>       |
| modA-R         | <u>GAG GAG AAG CCC GGT TAT TCG CCA TCT TTT TTC TCC G</u>   |
| siaB-F         | GAC GAC GAC AAG ATG AAA ATA ATA ATG ACA AGA ATT<br>GCA ATT |
| siaB-R         | GAG GAG AAG CCC GGG AAT TCT TTT GAA ATT AAA CTT<br>TCG G   |
| HMW1-F         | CTC TTA GTA CTA GTA CAA ACC CAC                            |
| HMW2-F         | CCA CTC AAA TAA ACT GGT TAA ATA TAC                        |
| HMW3-F         | GCC GAG CAA ACC GCT TAT ATT GGC                            |
| HMW-R          | GCA ATA TGG CGG AAA GTG GC                                 |
| 16SF           | ACG GAG GGT GCG AGC GTT AAT C                              |
| 16SR           | CTG CCT TCG CCT TCG GTA TTC CT                             |
| Hflu203000185F | CAT TGC ACG TGC CTT AGC GA                                 |
| Hflu203000185R | GCA GAA TAG ATT GCG TCG TTG C                              |
| Hflu203001388F | TGA AAG GGG ACA AAG TTG CG                                 |
| Hflu203001388R | CAA CCG CTT GTA ATG CCA CAC                                |
| Hflu203001650F | CGC AAC GCT GGC TTG TAA CA                                 |
| Hflu203001650R | TCT GCA TTG ATT GGC CAT AAA                                |
| Hflu203000518F | TTC CAT TTG TGC GGA TGC C                                  |
| Hflu203000518R | CGG TCA TTT CTG TGC CAC G                                  |



## Supplementary references

- 1 Clark, T. A. *et al.* Characterization of DNA methyltransferase specificities using single-molecule, real-time DNA sequencing. *Nucleic Acids Res.* **40**, e29 (2012).
- 2 Novotny, L. A. *et al.* Epitope mapping immunodominant regions of the PilA protein of nontypeable *Haemophilus influenzae* (NTHI) to facilitate the design of two novel chimeric vaccine candidates. *Vaccine* **28**, 279-289 (2009).
- 3 Bae, S. *et al.* Antimicrobial resistance in *Haemophilus influenzae* respiratory tract isolates in Korea: results of a nationwide acute respiratory infections surveillance. *Antimicrob Agents Chemother* **54**, 65-71 (2010).
- 4 Goldstein, F. W., Emirian, M. F., Coutrot, A. & Acar, J. F. Bacteriostatic and bactericidal activity of azithromycin against *Haemophilus influenzae*. *J Antimicrob Chemother* **25 Suppl A**, 25-28 (1990).
- 5 Harrison, C. J., Woods, C., Stout, G., Martin, B. & Selvarangan, R. Susceptibilities of *Haemophilus influenzae*, *Streptococcus pneumoniae*, including serotype 19A, and *Moraxella catarrhalis* paediatric isolates from 2005 to 2007 to commonly used antibiotics. *J Antimicrob Chemother* **63**, 511-519 (2009).
- 6 Perez-Vazquez, M., Roman, F., Aracil, B., Canton, R. & Campos, J. Laboratory detection of *Haemophilus influenzae* with decreased susceptibility to nalidixic acid, ciprofloxacin, levofloxacin, and moxifloxacin due to GyrA and ParC mutations. *J Clin Microbiol* **42**, 1185-1191 (2004).
